# Supplementary material
Source: HighWire-hosted journal article supplement (https://bmjopen.bmj.com/content/14/12/e084405)
Supplement: inline-supplementary-material-1 [file inline-supplementary-material-1.pdf]

Supplementary Appendix

The Timing Dilemma: A Systematic Review and Meta-analysis of Short-Term Mortality in Patients With COVID-19 Undergoing Tracheostomy With Varied Definitions of Early, Including 7, 10, and 14 Days

Beong Ki Kim, MD; Hangseok Choi, PhD; and Chi Young Kim, MD, PhD

Table of Contents

|                                                                                                 | Page  |
|-------------------------------------------------------------------------------------------------|-------|
| Supplementary Table 1. PRISMA checklist.....                                                    | 20202 |
| Supplementary Table 2. Detailed search strategy of individual databases.....                    | 5     |
| Supplementary Table 3. Results of quality assessment by the Newcastle–Ottawa Scale.....         | 8     |
| Supplementary Table 4. Clinical characteristics of studies included in a systematic review..... | 9     |
| Supplementary Table 5. Categorisation of the study and baseline characteristics.....            | 11    |
| Supplementary Figure 1. Funnel plot for overall short-term mortality.....                       | 12    |

Supplementary Table 1. PRISMA 2020 checklist

| Section and topic             | Item # | Checklist item                                                                                                                                                                                                                                                                                       | Location where the item is reported |
|-------------------------------|--------|------------------------------------------------------------------------------------------------------------------------------------------------------------------------------------------------------------------------------------------------------------------------------------------------------|-------------------------------------|
| TITLE                         |        |                                                                                                                                                                                                                                                                                                      |                                     |
| Title                         | 1      | Identify the report as a systematic review.                                                                                                                                                                                                                                                          | Page 1                              |
| ABSTRACT                      |        |                                                                                                                                                                                                                                                                                                      |                                     |
| Abstract                      | 2      | See the PRISMA 2020 for Abstracts checklist.                                                                                                                                                                                                                                                         | N/A                                 |
| INTRODUCTION                  |        |                                                                                                                                                                                                                                                                                                      |                                     |
| Rationale                     | 3      | Describe the rationale for the review in the context of existing knowledge.                                                                                                                                                                                                                          | Page 6                              |
| Objectives                    | 4      | Provide an explicit statement of the objective(s) or question(s) the review addresses.                                                                                                                                                                                                               | Page 6                              |
| METHODS                       |        |                                                                                                                                                                                                                                                                                                      |                                     |
| Eligibility criteria          | 5      | Specify the inclusion and exclusion criteria for the review and how studies were grouped for the syntheses.                                                                                                                                                                                          | Pages 7-8                           |
| Information sources           | 6      | Specify all databases, registers, websites, organisations, reference lists, and other sources searched or consulted to identify studies. Specify the date when each source was last searched or consulted.                                                                                           | Page 7, Figure 1                    |
| Search strategy               | 7      | Present the full search strategies for all databases, registers, and websites, including any filters and limits used.                                                                                                                                                                                | Supp Table 2                        |
| Selection process             | 8      | Specify the methods used to decide whether a study met the inclusion criteria of the review, including how many reviewers screened each record and each report retrieved, whether they worked independently, and if applicable, details of automation tools used in the process.                     | Page 7                              |
| Data collection process       | 9      | Specify the methods used to collect data from reports, including how many reviewers collected data from each report, whether they worked independently, any processes for obtaining or confirming data from study investigators, and if applicable, details of automation tools used in the process. | Page 7                              |
| Data items                    | 10a    | List and define all outcomes for which data were sought. Specify whether all results that were compatible with each outcome domain in each study were sought (e.g. for all measures, time points, analyses), and if not, the methods used to decide which results to collect.                        | Page 7                              |
|                               | 10b    | List and define all other variables for which data were sought (e.g. participant and intervention characteristics, funding sources). Describe any assumptions made about any missing or unclear information.                                                                                         | Pages 7-8                           |
| Study risk of bias assessment | 11     | Specify the methods used to assess the risk of bias in the included studies, including details of the tool(s) used, how many reviewers assessed each study and whether they worked independently, and if applicable, details of automation tools used in the process.                                | Page 9                              |
| Effect measures               | 12     | Specify for each outcome the effect measure(s) (e.g. risk ratio, mean difference) used in the synthesis or presentation of results.                                                                                                                                                                  | Page 9                              |
| Synthesis methods             | 13a    | Describe the processes used to decide which studies were eligible for each synthesis (e.g. tabulating the study intervention characteristics and comparing against the planned groups for each synthesis (item #5)).                                                                                 | Page 7                              |
|                               | 13b    | Describe any methods required to prepare the data for presentation or synthesis, such as handling of missing summary statistics, or data conversions.                                                                                                                                                | Page 9                              |
|                               | 13c    | Describe any methods used to tabulate or visually display the results of individual studies and syntheses.                                                                                                                                                                                           | Table 1                             |
|                               | 13d    | Describe any methods used to synthesise results and provide a rationale for the choice(s). If meta-analysis was performed, describe the model(s), method(s) to identify the presence and extent of statistical heterogeneity, and software package(s) used.                                          | Page 9                              |

| Section and topic             | Item # | Checklist item                                                                                                                                                                                                                                                                       | Location where the item is reported |
|-------------------------------|--------|--------------------------------------------------------------------------------------------------------------------------------------------------------------------------------------------------------------------------------------------------------------------------------------|-------------------------------------|
|                               | 13e    | Describe any methods used to explore possible causes of heterogeneity among study results (e.g. subgroup analysis, meta-regression).                                                                                                                                                 | Page9, Table 2                      |
|                               | 13f    | Describe any sensitivity analyses conducted to assess the robustness of the synthesised results.                                                                                                                                                                                     | Figure 2                            |
| Reporting bias assessment     | 14     | Describe any methods used to assess the risk of bias due to missing results in a synthesis (arising from reporting biases).                                                                                                                                                          | Supp figure 1                       |
| Certainty assessment          | 15     | Describe any methods used to assess certainty (or confidence) in the body of evidence for an outcome.                                                                                                                                                                                | Figure 2                            |
| <b>RESULTS</b>                |        |                                                                                                                                                                                                                                                                                      |                                     |
| Study selection               | 16a    | Describe the results of the search and selection process, from the number of records identified in the search to the number of studies included in the review, ideally using a flow diagram.                                                                                         | Pages 9-10, Figure 1                |
|                               | 16b    | Cite studies that might appear to meet the inclusion criteria, but which were excluded, and explain why they were excluded.                                                                                                                                                          | Pages 9-10, Figure 1                |
| Study characteristics         | 17     | Cite each included study and present its characteristics.                                                                                                                                                                                                                            | Table 1                             |
| Risk of bias in studies       | 18     | Present assessments of risk of bias for each included study.                                                                                                                                                                                                                         | Supp. Table 3                       |
| Results of individual studies | 19     | For all outcomes, present, for each study: (a) summary statistics for each group (where appropriate) and (b) an effect estimate and its precision (e.g. confidence/credible interval), ideally using structured tables or plots.                                                     | Table 1, Figure 2                   |
| Results of syntheses          | 20a    | For each synthesis, briefly summarise the characteristics and risk of bias among contributing studies.                                                                                                                                                                               | Page 10                             |
|                               | 20b    | Present results of all statistical syntheses conducted. If meta-analysis was done, present for each the summary estimate and its precision (e.g. confidence/credible interval) and measures of statistical heterogeneity. If comparing groups, describe the direction of the effect. | Figure 2                            |
|                               | 20c    | Present results of all investigations of possible causes of heterogeneity among study results.                                                                                                                                                                                       | Page 10                             |
|                               | 20d    | Present results of all sensitivity analyses conducted to assess the robustness of the synthesised results.                                                                                                                                                                           | Page 10                             |
| Reporting biases              | 21     | Present assessments of risk of bias due to missing results (arising from reporting biases) for each synthesis assessed.                                                                                                                                                              | Page 10                             |
| Certainty of evidence         | 22     | Present assessments of certainty (or confidence) in the body of evidence for each outcome assessed.                                                                                                                                                                                  | Pages 10-11                         |
| <b>DISCUSSION</b>             |        |                                                                                                                                                                                                                                                                                      |                                     |
| Discussion                    | 23a    | Provide a general interpretation of the results in the context of other evidence.                                                                                                                                                                                                    | Pages 11-12                         |
|                               | 23b    | Discuss any limitations of the evidence included in the review.                                                                                                                                                                                                                      | Page 14                             |
|                               | 23c    | Discuss any limitations of the review processes used.                                                                                                                                                                                                                                | Page 14                             |
|                               | 23d    | Discuss the implications of the results for practice, policy, and future research.                                                                                                                                                                                                   | Page 14                             |
| <b>OTHER INFORMATION</b>      |        |                                                                                                                                                                                                                                                                                      |                                     |
| Registration and              | 24a    | Provide registration information for the review, including the register name and registration number, or state that the review was not registered.                                                                                                                                   |                                     |

| Section and topic                               | Item # | Checklist item                                                                                                                                                                                                                             | Location where the item is reported |
|-------------------------------------------------|--------|--------------------------------------------------------------------------------------------------------------------------------------------------------------------------------------------------------------------------------------------|-------------------------------------|
| protocol                                        | 24b    | Indicate where the review protocol can be accessed, or state that a protocol was not prepared.                                                                                                                                             | Page 7                              |
|                                                 | 24c    | Describe and explain any amendments to information provided at registration or in the protocol.                                                                                                                                            | Page 7                              |
| Support                                         | 25     | Describe sources of financial or non-financial support for the review, and the role of the funders or sponsors in the review.                                                                                                              | Page 15                             |
| Competing interests                             | 26     | Declare any competing interests of review authors.                                                                                                                                                                                         | Page 15                             |
| Availability of data, code, and other materials | 27     | Report which of the following are publicly available and where they can be found: template data collection forms; data extracted from included studies; data used for all analyses; analytic code; any other materials used in the review. | N/A                                 |

From: Page MJ, McKenzie JE, Bossuyt PM, et al. The PRISMA 2020 statement: an updated guideline for reporting systematic reviews. BMJ 2021;372:n71. doi: 10.1136/bmj.n71  
For more information, visit: <http://www.prisma-statement.org/>

**Supplementary Table 2.** Detailed search strategy of individual databases

| Databases | No. | Search Query                                                                                                                                                                                                                                                                                                                                                                                                                                                                                                                                                                                           | Search Results |
|-----------|-----|--------------------------------------------------------------------------------------------------------------------------------------------------------------------------------------------------------------------------------------------------------------------------------------------------------------------------------------------------------------------------------------------------------------------------------------------------------------------------------------------------------------------------------------------------------------------------------------------------------|----------------|
| PubMed    | #1  | Tracheostomy[mh] OR tracheostom*[tw] OR tracheotom*[tw]                                                                                                                                                                                                                                                                                                                                                                                                                                                                                                                                                | 30,084         |
|           | #2  | early[tw] AND (late[tw] OR delayed[tw])                                                                                                                                                                                                                                                                                                                                                                                                                                                                                                                                                                | 254,764        |
|           | #3  | Time Factors[mh] OR early[tw] OR late[tw] OR delayed[tw] OR timing[tw]                                                                                                                                                                                                                                                                                                                                                                                                                                                                                                                                 | 3,685,033      |
|           | #4  | Comparative Study[pt] OR compar*[tw] OR versus[tw] OR group*[tw]                                                                                                                                                                                                                                                                                                                                                                                                                                                                                                                                       | 10,392,629     |
|           | #5  | timing[ti] OR early tracheostom*[ti] OR late tracheostom*[ti] OR delayed tracheostom*[ti]                                                                                                                                                                                                                                                                                                                                                                                                                                                                                                              | 27,929         |
|           | #6  | #2 OR (#3 AND #4) OR #5                                                                                                                                                                                                                                                                                                                                                                                                                                                                                                                                                                                | 1,659,421      |
|           | #7  | #1 AND #6                                                                                                                                                                                                                                                                                                                                                                                                                                                                                                                                                                                              | 2,513          |
|           | #8  | COVID-19[mh] OR SARS-CoV-2[mh] OR COVID-19[tw] OR COVID19[tw] OR severe acute respiratory syndrome coronavirus 2[tw] OR SARS-CoV-2[tw] OR coronavirus disease 2019[tw] OR novel coronavirus[tw] OR 2019-nCoV[tw] OR 2019nCoV[tw] OR coronavirus 2019[tw] OR SARS-CoV2[tw] OR SARS coronavirus 2[tw] OR corona virus disease 2019[tw] OR COVID-2019[tw] OR novel corona virus[tw] OR COVID2019[tw] OR novel 2019 coronavirus[tw] OR nCoV 2019[tw] OR SARS-CoV-19[tw] OR nCoV2019[tw] OR corona virus 2019[tw] OR HCoV-19[tw] OR NCOVID-19[tw] OR 2019 new coronavirus[tw] OR human coronavirus 2019[tw] | 377,901        |
|           | #9  | #7 AND #8                                                                                                                                                                                                                                                                                                                                                                                                                                                                                                                                                                                              | 124            |
|           | #10 | (Animals[mh] NOT Humans[mh]) OR Models, Animal[mh:noexp] OR Disease Models, Animal[mh] OR Animal Experimentation[mh]                                                                                                                                                                                                                                                                                                                                                                                                                                                                                   | 5,358,021      |
|           | #11 | Case Reports[pt] OR case report*[tw] OR case stud*[tw] OR case series[tw] OR case[ti] OR cases[ti]                                                                                                                                                                                                                                                                                                                                                                                                                                                                                                     | 3,064,578      |
|           | #12 | English[la]                                                                                                                                                                                                                                                                                                                                                                                                                                                                                                                                                                                            | 31,336,147     |
|           | #13 | #9 NOT #10 NOT #11 AND #12                                                                                                                                                                                                                                                                                                                                                                                                                                                                                                                                                                             | 110            |
| Embase    | #1  | tracheostomy/exp OR (tracheo\$tom*):ti,ab,kw                                                                                                                                                                                                                                                                                                                                                                                                                                                                                                                                                           | 49,101         |
|           | #2  | early:ti,ab,kw AND (late OR delayed):ti,ab,kw                                                                                                                                                                                                                                                                                                                                                                                                                                                                                                                                                          | 338,210        |
|           | #3  | ('time factor'/de OR (early OR late OR delayed OR timing):ti,ab,kw)                                                                                                                                                                                                                                                                                                                                                                                                                                                                                                                                    | 3,496,033      |
|           | #4  | ('comparative study'/de OR (compar* OR versus OR group*):ti,ab,kw)                                                                                                                                                                                                                                                                                                                                                                                                                                                                                                                                     | 13,044,874     |
|           | #5  | timing:ti OR ((early OR late OR delayed) NEXT/1 tracheo*\$tom*):ti                                                                                                                                                                                                                                                                                                                                                                                                                                                                                                                                     | 35,008         |
|           | #6  | #2 OR (#3 AND #4) OR #5                                                                                                                                                                                                                                                                                                                                                                                                                                                                                                                                                                                | 1,685,889      |
|           | #7  | #1 AND #6                                                                                                                                                                                                                                                                                                                                                                                                                                                                                                                                                                                              | 3,873          |
|           | #8  | ('coronavirus disease 2019'/exp OR (COVID-19 OR COVID19 OR 'severe acute respiratory syndrome coronavirus 2' OR SARS-CoV-2 OR 'coronavirus disease 2019' OR 'novel coronavirus' OR 2019-nCoV OR 2019nCoV OR 'coronavirus 2019' OR SARS-CoV2 OR 'SARS coronavirus 2' OR 'corona virus disease 2019' OR COVID-2019 OR 'novel corona virus' OR COVID2019 OR 'novel 2019 coronavirus' OR 'nCoV 2019' OR SARS-CoV-19 OR nCoV2019 OR 'corona virus 2019' OR HCoV-19 OR NCOVID-19 OR '2019 new                                                                                                                | 445,528        |

|                  |     |                                                                                                                                                                                                                                                                                                                                                                                                                                                                                                                                                               |            |
|------------------|-----|---------------------------------------------------------------------------------------------------------------------------------------------------------------------------------------------------------------------------------------------------------------------------------------------------------------------------------------------------------------------------------------------------------------------------------------------------------------------------------------------------------------------------------------------------------------|------------|
|                  |     | coronavirus' OR 'human coronavirus 2019'):ti,ab,kw)                                                                                                                                                                                                                                                                                                                                                                                                                                                                                                           |            |
|                  | #9  | #7 AND #8                                                                                                                                                                                                                                                                                                                                                                                                                                                                                                                                                     | 256        |
|                  | #10 | (animal/exp NOT human/exp) OR 'animal model'/exp OR 'animal experiment'/exp OR [animal cell]/lim OR [animal experiment]/lim OR [animal model]/lim OR [animal tissue]/lim                                                                                                                                                                                                                                                                                                                                                                                      | 7,161,734  |
|                  | #11 | ('case report'/de OR 'case study'/exp OR (case NEXT/1 (report* OR stud* OR series)):ti,ab,kw OR (case OR cases):ti)                                                                                                                                                                                                                                                                                                                                                                                                                                           | 3,832,070  |
|                  | #12 | [english]/lim                                                                                                                                                                                                                                                                                                                                                                                                                                                                                                                                                 | 37,311,026 |
|                  | #13 | #9 NOT #10 NOT #11 AND #12                                                                                                                                                                                                                                                                                                                                                                                                                                                                                                                                    | 219        |
|                  | #1  | [mh Tracheostomy] OR (tracheo?tom*):ti,ab,kw                                                                                                                                                                                                                                                                                                                                                                                                                                                                                                                  | 1,690      |
| Cochrane Library | #2  | early:ti,ab,kw AND (late OR delayed):ti,ab,kw                                                                                                                                                                                                                                                                                                                                                                                                                                                                                                                 | 17,482     |
|                  | #3  | [mh "Time Factors"] OR (early OR late OR delayed OR timing):ti,ab,kw                                                                                                                                                                                                                                                                                                                                                                                                                                                                                          | 261,116    |
|                  | #4  | [mh "Comparative Study"] OR (compar* OR versus OR group*):ti,ab,kw                                                                                                                                                                                                                                                                                                                                                                                                                                                                                            | 1,386,488  |
|                  | #5  | timing:ti OR ((early OR late OR delayed) NEXT tracheo*tom*):ti                                                                                                                                                                                                                                                                                                                                                                                                                                                                                                | 2,966      |
|                  | #6  | #2 OR (#3 AND #4) OR #5                                                                                                                                                                                                                                                                                                                                                                                                                                                                                                                                       | 207,488    |
|                  | #7  | #1 AND #6                                                                                                                                                                                                                                                                                                                                                                                                                                                                                                                                                     | 346        |
|                  | #8  | [mh "COVID-19"] OR [mh "SARS-CoV-2"] OR ("COVID-19" OR COVID19 OR "severe acute respiratory syndrome coronavirus 2" OR "SARS-CoV-2" OR "coronavirus disease 2019" OR "novel coronavirus" OR "2019-nCoV" OR 2019nCoV OR "coronavirus 2019" OR SARS-CoV2 OR "SARS coronavirus 2" OR "corona virus disease 2019" OR "COVID-2019" OR "novel corona virus" OR COVID2019 OR "novel 2019 coronavirus" OR "nCoV 2019" OR "SARS-CoV-19" OR nCoV2019 OR "corona virus 2019" OR "HCoV-19" OR "NCOVID-19" OR "2019 new coronavirus" OR "human coronavirus 2019"):ti,ab,kw | 17,477     |
|                  | #9  | #7 AND #8                                                                                                                                                                                                                                                                                                                                                                                                                                                                                                                                                     | 11         |
|                  | #1  | TS=(tracheostom* OR tracheotom*)                                                                                                                                                                                                                                                                                                                                                                                                                                                                                                                              | 19,583     |
| Web of Science   | #2  | TS=(early) AND TS=(late OR delayed)                                                                                                                                                                                                                                                                                                                                                                                                                                                                                                                           | 585,096    |
|                  | #3  | TS=(early OR late OR delayed OR timing)                                                                                                                                                                                                                                                                                                                                                                                                                                                                                                                       | 13,456,156 |
|                  | #4  | TS=(compar* OR versus OR group*)                                                                                                                                                                                                                                                                                                                                                                                                                                                                                                                              | 15,939,532 |
|                  | #5  | TI=(timing) OR TI=((early OR late OR delayed) NEAR/0 tracheo*tom*)                                                                                                                                                                                                                                                                                                                                                                                                                                                                                            | 1,173,166  |
|                  | #6  | #2 OR (#3 AND #4) OR #5                                                                                                                                                                                                                                                                                                                                                                                                                                                                                                                                       | 5,836,600  |
|                  | #7  | #1 AND #6                                                                                                                                                                                                                                                                                                                                                                                                                                                                                                                                                     | 3,420      |
|                  | #8  | TS=(COVID-19 OR COVID19 OR "severe acute respiratory syndrome coronavirus 2" OR SARS-CoV-2 OR "coronavirus disease 2019" OR "novel coronavirus" OR 2019-nCoV OR 2019nCoV OR "coronavirus 2019" OR SARS-CoV2 OR "SARS coronavirus 2" OR "corona virus disease 2019" OR COVID-2019 OR "novel corona virus" OR COVID2019 OR "novel 2019 coronavirus" OR "nCoV 2019" OR SARS-CoV-19 OR nCoV2019 OR "corona virus 2019" OR HCoV-19 OR NCOVID-19 OR "2019 new coronavirus" OR "human coronavirus 2019")                                                             | 470,591    |
|                  | #9  | #7 AND #8                                                                                                                                                                                                                                                                                                                                                                                                                                                                                                                                                     | 174        |

|        |     |                                                                                                                                                                                                                                                                                                                                                                                                                                                                                                             |            |
|--------|-----|-------------------------------------------------------------------------------------------------------------------------------------------------------------------------------------------------------------------------------------------------------------------------------------------------------------------------------------------------------------------------------------------------------------------------------------------------------------------------------------------------------------|------------|
| Scopus | #10 | TS=(case NEAR/0 (report* OR stud* OR series)) OR TI=(case OR cases)                                                                                                                                                                                                                                                                                                                                                                                                                                         | 2,038,667  |
|        | #11 | #9 NOT #10                                                                                                                                                                                                                                                                                                                                                                                                                                                                                                  | 161        |
|        | #12 | Language restriction                                                                                                                                                                                                                                                                                                                                                                                                                                                                                        | 158        |
|        | #1  | TITLE-ABS-KEY(tracheo?tom*)                                                                                                                                                                                                                                                                                                                                                                                                                                                                                 | 34,924     |
|        | #2  | TITLE-ABS-KEY(early) AND TITLE-ABS-KEY(late OR delayed)                                                                                                                                                                                                                                                                                                                                                                                                                                                     | 528,582    |
|        | #3  | TITLE-ABS-KEY(early OR late OR delayed OR timing)                                                                                                                                                                                                                                                                                                                                                                                                                                                           | 5,682,642  |
|        | #4  | TITLE-ABS-KEY(compar* OR versus OR group*)                                                                                                                                                                                                                                                                                                                                                                                                                                                                  | 22,905,832 |
|        | #5  | TITLE(timing) OR TITLE((early OR late OR delayed) PRE/0 tracheo*tom*)                                                                                                                                                                                                                                                                                                                                                                                                                                       | 67,099     |
|        | #6  | #2 OR (#3 AND #4) OR #5                                                                                                                                                                                                                                                                                                                                                                                                                                                                                     | 2,366,929  |
|        | #7  | #1 AND #6                                                                                                                                                                                                                                                                                                                                                                                                                                                                                                   | 2,594      |
|        | #8  | TITLE-ABS-KEY(COVID-19 OR COVID19 OR "severe acute respiratory syndrome coronavirus 2" OR SARS-CoV-2 OR "coronavirus disease 2019" OR "novel coronavirus" OR 2019-nCoV OR 2019nCoV OR "coronavirus 2019" OR SARS-CoV2 OR "SARS coronavirus 2" OR "corona virus disease 2019" OR COVID-2019 OR "novel corona virus" OR COVID2019 OR "novel 2019 coronavirus" OR "nCoV 2019" OR SARS-CoV-19 OR nCoV2019 OR "corona virus 2019" OR HCoV-19 OR NCOVID-19 OR "2019 new coronavirus" OR "human coronavirus 2019") | 560,787    |
|        | #9  | #7 AND #8                                                                                                                                                                                                                                                                                                                                                                                                                                                                                                   | 175        |
|        | #10 | TITLE-ABS-KEY(case PRE/0 (report* OR stud* OR series)) OR TITLE(case OR cases)                                                                                                                                                                                                                                                                                                                                                                                                                              | 4,825,604  |
|        | #11 | #9 AND NOT #10                                                                                                                                                                                                                                                                                                                                                                                                                                                                                              | 157        |
|        | #12 | Language restriction                                                                                                                                                                                                                                                                                                                                                                                                                                                                                        | 153        |
|        |     |                                                                                                                                                                                                                                                                                                                                                                                                                                                                                                             |            |

Supplementary Table 3. Results of quality assessment by the Newcastle–Ottawa Scale

| Author               | Selection |   |   |   | Comparability | Outcome |   |   | Total score |
|----------------------|-----------|---|---|---|---------------|---------|---|---|-------------|
|                      | A         | B | C | D |               | a       | b | c |             |
| Hansson et al.       | +         | + | + | + | +             | +       | + | + | 8           |
| Livneh et al.        | +         | + | + | + | ++            | +       | + | - | 8           |
| Vuu et al.           | +         | + | + | + | ++            | +       | + | + | 9           |
| Flinspach et al.     | +         | + | + | + | +             | +       | + | + | 8           |
| Evrard et al.        | +         | + | + | + | ++            | +       | - | + | 8           |
| Volo et al.          | +         | + | + | + | ++            | +       | - | - | 7           |
| Avilés-Jurado et al. | +         | + | + | + | ++            | +       | - | - | 7           |
| Chandran et al.      | +         | + | + | + | ++            | +       | + | - | 8           |
| Shreckengost et al.  | -         | - | + | + | +             | +       | + | + | 6           |
| Navaratnam et al.    | +         | + | + | + | +             | +       | + | - | 7           |
| Bui et al.           | +         | + | + | + | ++            | +       | - | - | 7           |
| Takhar et al.        | +         | + | + | + | +             | +       | - | - | 6           |

Selection

- A. Representatives of the exposed cohort
- B. Selection of the non-exposed cohort
- C. Ascertainment of exposure
- D. Demonstration that the outcome of interest was not present at the start of the study

Comparability

Comparability of cohorts based on the design or analysis

Outcome

- a. Assessment of outcomes
- b. Was follow-up long enough for outcomes to occur
- c. Adequacy of follow-up of cohorts



**Supplementary Table 4.** Clinical characteristics of studies included in a systematic review

| 1 <sup>st</sup> author | Publication year | Design                       | Outcome               | Country | Study periods             | Approach     | Definition of early | No. of patients | Age         | Male        |
|------------------------|------------------|------------------------------|-----------------------|---------|---------------------------|--------------|---------------------|-----------------|-------------|-------------|
| Hansson et al.         | 2022             | Retrospective, multicenter   | 30-day mortality      | Sweden  | Mar 14, 2020–Mar 13, 2021 | Both         | ≤7 days             | 117             | 66 (18–87)  | 90 (76.9%)  |
| Livneh et al.          | 2021             | Retrospective, single-center | Unspecified mortality | Israel  | Mar 2020–Jan 2021         | Open         | ≤7 days             | 38              | 64 (56–72)  | 33 (86.8%)  |
| Vuu et al.             | 2023             | Retrospective, multicenter   | In-patients mortality | USA     | Jan 1, 2020–Sep 20, 2020  | N/A          | ≤10 days            | 395             | 61.9 ± 12.7 | 222 (56.2%) |
| Flinspach et al.       | 2022             | Retrospective, single-center | In-hospital mortality | Germany | Mar 2020–Jun 2021         | Percutaneous | ≤10 days            | 117             | 60.1 ± 13.7 | 97 (82.9%)  |
| Evrard et al.          | 2021             | Retrospective, multicenter   | Unspecified mortality | France  | Jan 27, 2020–Mar 18, 2020 | Both         | ≤10 days            | 48              | 56 (47–65)  | 36 (75.0%)  |
| Volo et al.            | 2021             | Retrospective, multicenter   | In-hospital mortality | Italy   | Feb 22, 2020–Apr 26, 2020 | Both         | ≤10 days            | 23              | 69 (42–84)  | 21 (91.3%)  |
| Avilés-Jurado et al.   | 2021             | Prospective, single-center   | Unspecified mortality | Spain   | Mar 16, 2020–Apr 10, 2020 | Open         | ≤10 days            | 50              | 63.8 ± 9.7  | 33 (66.0%)  |
| Chandran et al.        | 2022             | Prospective, single-center   | 30-day mortality      | India   | Apr 1, 2020–Jan 31, 2021  | Open         | ≤10 days            | 51              | 52 (23–83)  | 32 (62.7%)  |

|                     |      |                              |                       |        |                           |      |          |      |             |              |
|---------------------|------|------------------------------|-----------------------|--------|---------------------------|------|----------|------|-------------|--------------|
| Shreckengost et al. | 2022 | Retrospective, multicenter   | 30-day mortality      | Global | Mar 1, 2020– Mar 31, 2021 | Both | ≤14 days | 549  | N/A         | 345 (63.8%)  |
| Navaratnam et al.   | 2022 | Retrospective, multicenter   | In-hospital mortality | UK     | Mar 1, 2020– Oct 31, 2020 | N/A  | ≤14 days | 1777 | N/A         | 1528 (70.7%) |
| Bui et al.          | 2023 | Retrospective, single-center | All-cause mortality   | USA    | Mar 2020– May 2022        | Open | ≤14 days | 219  | N/A         | 139 (63.5%)  |
| Takhar et al        | 2021 | Prospective, single-center   | Unspecified mortality | UK     | Mar 21, 2020–May 20, 2020 | Both | ≤14 days | 82   | 52.9 ± 12.2 | 55 (67.9%)   |

Categorical data are represented using numbers (percentages), whereas continuous variables are expressed as mean (standard deviation) or median (interquartile range), as reported in each study. Abbreviation: N/A, not applicable; USA, United States of America; UK, United Kingdom



**Supplementary Table 5.** Categorisation of the study and baseline characteristics

| Study and baseline characteristics | Subcategorisation     | N (%)     |
|------------------------------------|-----------------------|-----------|
| Publication year                   | 2021                  | 5 (41.7%) |
|                                    | 2022                  | 5 (41.7%) |
|                                    | 2023                  | 2 (16.7%) |
| Study design                       | Retrospective         | 9 (75.0%) |
|                                    | Prospective           | 3 (25.0%) |
|                                    | Single-centre         | 6 (50.0%) |
|                                    | Multicentre           | 6 (50.0%) |
| Outcome                            | In-hospital mortality | 3 (25.0%) |
|                                    | 30-day mortality      | 3 (25.0%) |
|                                    | Unspecified mortality | 4 (33.3%) |
|                                    | All-cause mortality   | 1 (8.3%)  |
|                                    | In-patient mortality  | 1 (8.3%)  |
| Continent of Surveyed Country      | Europe                | 6 (50.0%) |
|                                    | Asia                  | 2 (16.7%) |
|                                    | North America         | 1 (8.3%)  |
|                                    | Global                | 1 (8.3%)  |
| Tracheostomy approach              | Both                  | 5 (41.7%) |
|                                    | Open                  | 4 (33.3%) |
|                                    | Percutaneous          | 1 (8.3%)  |
|                                    | N/A                   | 2 (16.7%) |
| Definition of “early”              | ≤7 days               | 2 (16.7%) |
|                                    | ≤10 days              | 6 (50.0%) |
|                                    | ≤14 days              | 4 (33.3%) |

This data represents a restructured analysis of baseline characteristics of studies included in the current meta-analysis, as provided in Table 1 of the main text, categorised by various parameters. Abbreviation: N/A, not applicable

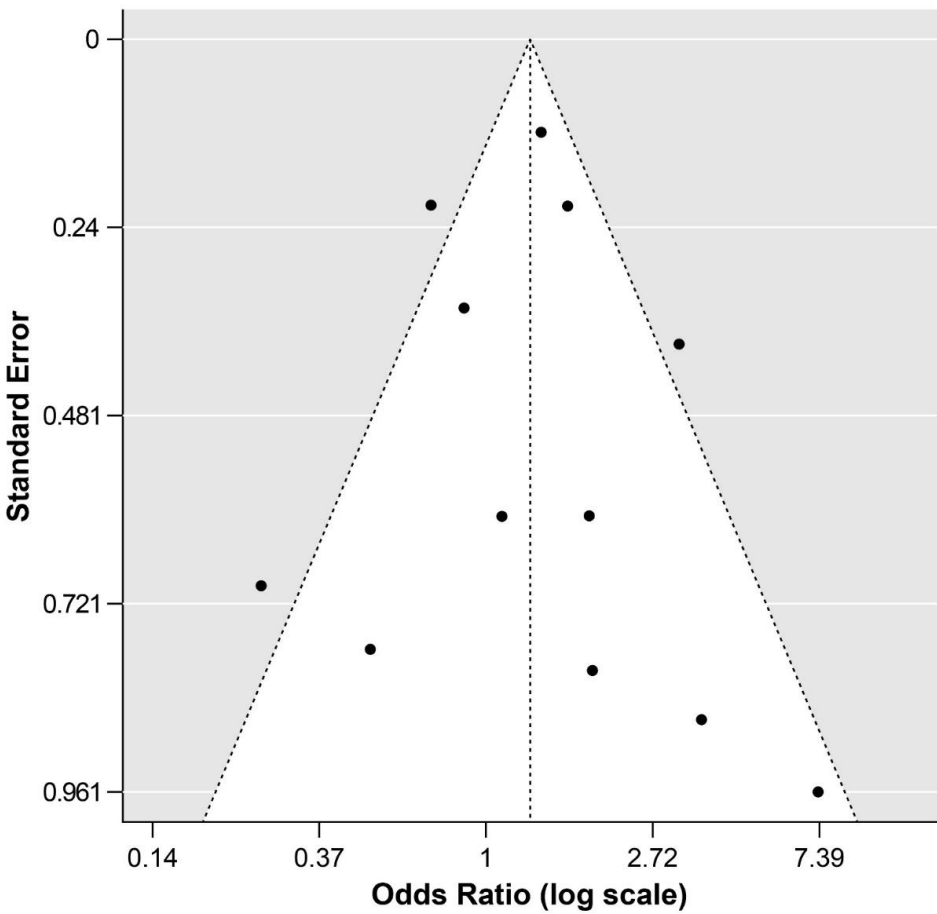

Supplementary Figure 1. Funnel plot for overall short-term mortality.
